# Supplementary material for: A novel tick-borne phlebovirus, closely related to severe fever with thrombocytopenia syndrome virus and Heartland virus, is a potential pathogen
Source: PubMed Central journal article supplement (PMC5970217; doi:10.1038/s41426-018-0093-2), 2018-05-25

Figure S4 A

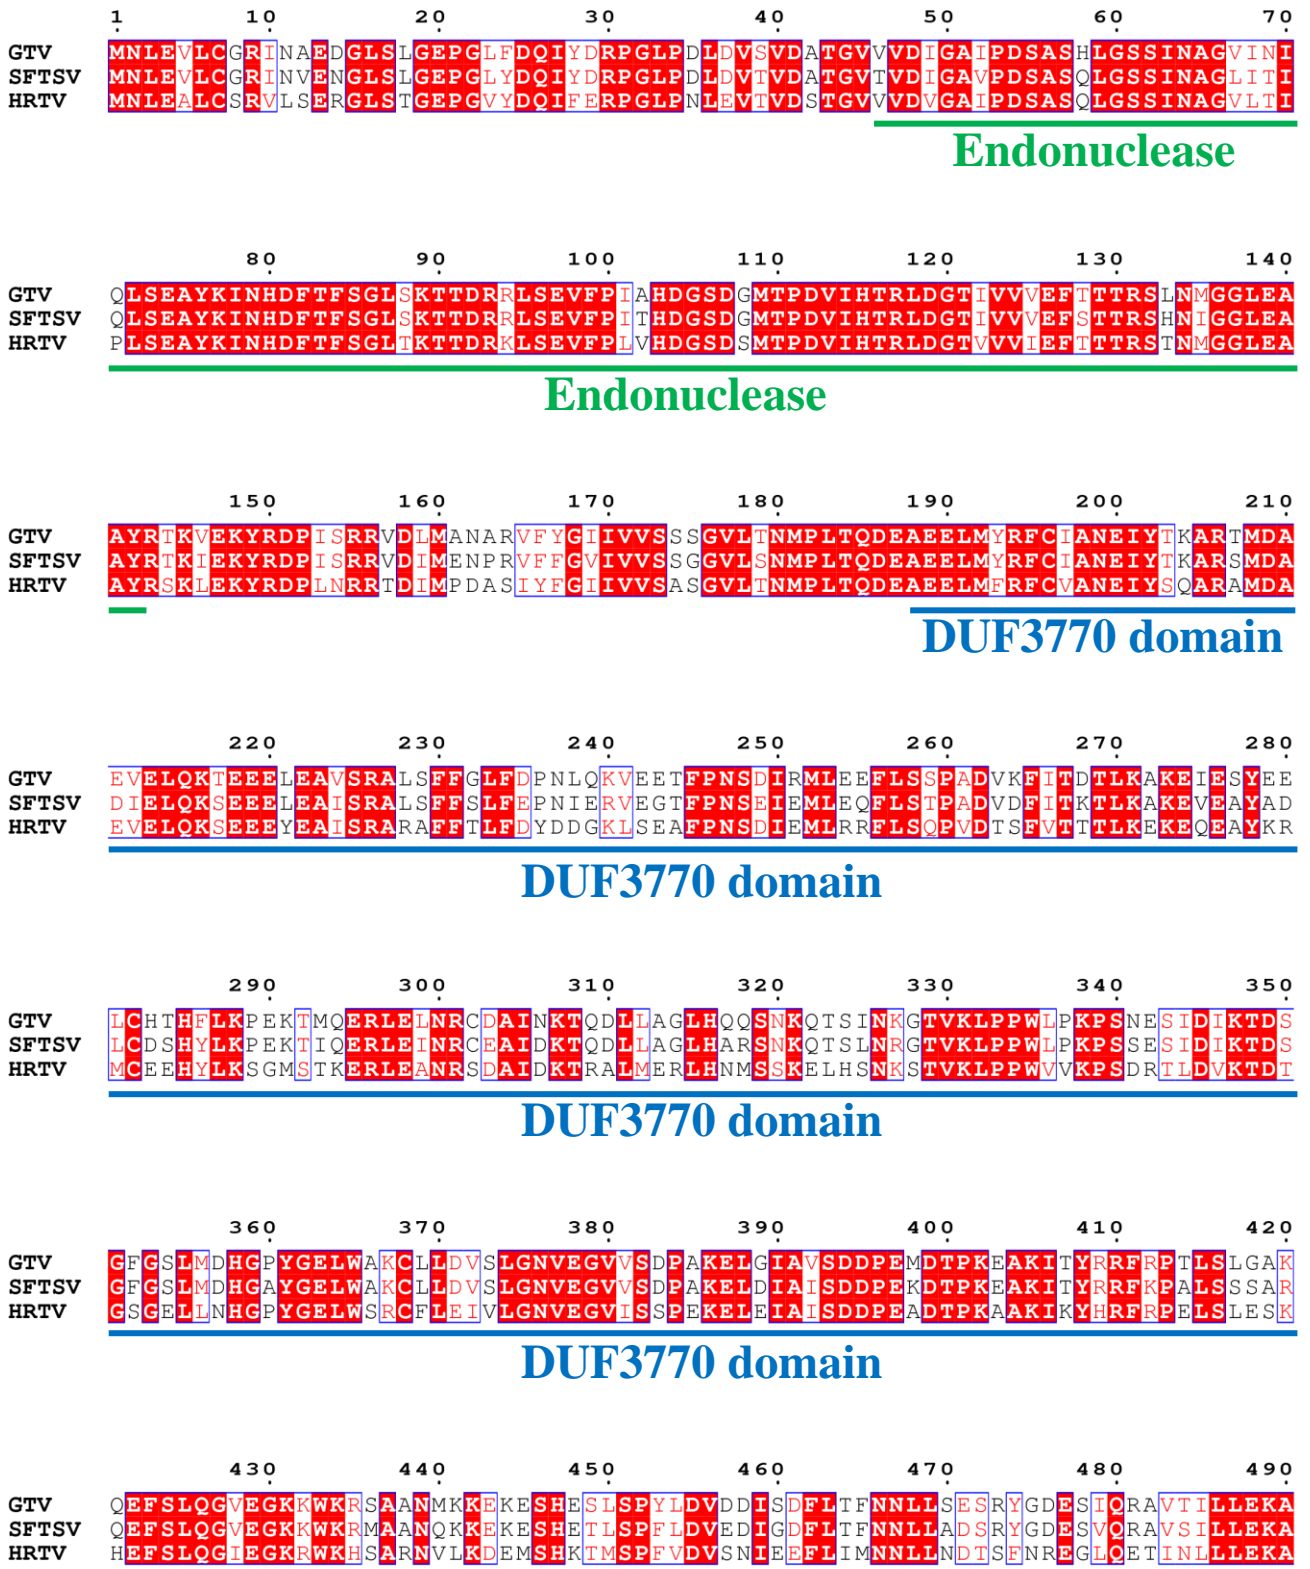

500 510 520 530 540 550 560

GTV S L M Q N T E L T N S L N D S F K R N L S S N V V Q W S L W V S C L A Q E L A S A L K Q H C R A G E F I I K K L K F W P I Y V I I K P T K S  
 SFTSV S A M Q D T E L T H A L N D S F K R N L S S N V V Q W S L W V S C L A Q E L A S A L K Q H C R A G E F I I K K L K F W P I Y V I I K P T K S  
 HRTV T E M H Q N G L S T A L N D S F K R N F N T N V V Q W S M W V S C L A Q E L A S A L K Q H C K P G E F I I K K L M H W P I F V I I K P T K S

570 580 590 600 610 620 630

GTV S S H I F Y S L A I K K S D I S K R L M G R V F S D T V D A G D W E L M E F K S L K T C K L T N L V N L P C T M L N S I A F W R E K L G V A  
 SFTSV S S H I F F S L G I R K A D V T R R L T G R V F S D T I D A G E W E L T E F K S L K T C K L T N L V N L P C T M L N S I A F W R E K L G V A  
 HRTV S S H I F Y S L A I K K A N I K R R L I G D V F T D T I D A G E W E F S E F K S L K T C K L T N L I N L P C T M L N S I A F W R E K M G V A

## BUNV\_Polymerase domain

640 650 660 670 680 690 700

GTV P W L V R K P C A E L R E Q V S L T F L V S L E D K A K T E E I I T L T R Y T Q M E G F V S A P M L P K P Q K M I S K L E G P L R T K L Q V  
 SFTSV P W L V R K P C S E L R E Q V G L T F L V S L E D K S K T E E I I T L T R Y T Q M E G F V S P P M L P K P Q K M I G K L D G P L R T K L Q V  
 HRTV P W I S R K A C S E L R E Q V A I T F L M S L E D K S T T E E L V T L T R Y S Q M E G F V S P P L L P K P Q K M V E K L E V P L R T K L Q V

## BUNV\_Polymerase domain

710 720 730 740 750 760 770

GTV F L L R K H L D C M V R V A S O P F T L I P R E G R I E W G G T F H A I S G R S T N L E N M V N S W Y I G Y Y K N K E E S T E V N A L G E M  
 SFTSV Y L L R K H L D C M V R I A S O P F N L I P R E G R V E W G G T F H A I S G R S T N L E N M V N S W Y I G Y Y K N K E E S T E L N A L G E M  
 HRTV F L F R R H L D A I V R V A A S P F P I V A R D G R V E W T G T F N A I T G R S T G L E N M V N N W Y I G Y Y K N K E E S T E L N A L G E M

## BUNV\_Polymerase domain

780 790 800 810 820 830 840

GTV Y K K I V E M E E D K P D D P T F L G W G D T S S P K R H E F S R S F L R A A C S S L E K E I T Q R H G R S W K Q N L E E R V L K E I G S K  
 SFTSV Y K K I V E M E E D K P S S P E F L G W G D T D S P K R H E F S R S F L R A A C S S L E R E I A Q R H G R Q W K Q N L E E R V L K E I G T K  
 HRTV Y K K I V E I E A E K P T S S E Y L G W G D T S S P K R H E F S R S F L K S A C I S L E K E I E M R H G K S W K Q S L E E R V L K E L G S K

## BUNV\_Polymerase domain

850 860 870 880 890 900 910

GTV N I L D L A S M K A T S N F S K E W E I F S E V Q T K E Y H R S K L L E K M A G L I E R G F M W Y I D A V G Q A W K A V L E D G C M R I C L  
 SFTSV N I L D L A S M K A T S N F S K D W E L Y S E V Q T K E Y H R S K L L E K M A T L I E K G V M W Y I D A V G Q A W K A V L D D G C M R I C L  
 HRTV N L L D L A T M K A T S N F S K E W E A F S E V R T K E Y H R S K L L E K M A E L I E H G L M W Y V D A A G H A W K A V L D D K C M R I C L

## BUNV\_Polymerase domain

920 930 940 950 960 970 980

GTV F K K N Q H G G L R E I Y V M D V N A R L V Q F G V E T M A R C V C E L S P H E T V A N P R L K S S I I E N H G L K S A R S L G P G S I N I  
 SFTSV F K K N Q H G G L R E I Y V M D A N A R L V Q F G V E T M A R C V C E L S P H E T V A N P R L K N S I I E N H G L K S A R S L G P G S I N I  
 HRTV F K K N Q H G G L R E I Y V T N A N A R L V Q F G V E T M A R C V C E L S P H E T I A N P R L K S S I I E N H G L K S A R O L G Q G T I N V

## BUNV\_Polymerase domain

|       |            |            |         |          |         |            |          |           |
|-------|------------|------------|---------|----------|---------|------------|----------|-----------|
|       | 990        | 1000       | 1010    | 1020     | 1030    | 1040       | 1050     |           |
| GTV   | NSSNDAKKWN | QGHYTTKLAL | VLCWFMP | SKFHKFIW | SAISMFR | RKKMMIDLRF | LTHLSKSD | SKSSDAFRE |
| SFTSV | NSSNDAKKWN | QGHYTTKLAL | VLCWFMP | AKFHRFIW | AAISMFR | RKKMMVDLRF | LATHLSK  | SESRSDPFR |
| HRTV  | NSSNDAKKWS | QGHYTTKLAM | VLCWFMP | AKFHRFIW | AGISMFR | CKKMMIDLRF | LEKLS    | TKANQKTD  |

## BUNV\_Polymerase domain

|       |      |           |      |        |         |          |         |          |
|-------|------|-----------|------|--------|---------|----------|---------|----------|
|       | 1060 | 1070      | 1080 | 1090   | 1100    | 1110     | 1120    |          |
| GTV   | AMTN | AFHGNSEAS | WMEK | GKTYIQ | TETGMMQ | GILHFTSS | LLHSCVQ | SFYKTYFV |
| SFTSV | AMTD | AFHGNREVS | WMDK | GRTYIK | TETGMMQ | GILHFTSS | LLHSCVQ | SFYKSYFV |
| HRTV  | DLAG | AFHGNVEVP | WMTQ | GATYIQ | TETGMMQ | GILHFTSS | LLHSCVQ | SFYKAYFL |

## BUNV\_Polymerase domain

|       |           |          |        |         |        |       |        |
|-------|-----------|----------|--------|---------|--------|-------|--------|
|       | 1130      | 1140     | 1150   | 1160    | 1170   | 1180  | 1190   |
| GTV   | VVEGSDDSA | IMISIRPK | SDMDEV | RSRFFV  | ANLLH  | SVKYL | LNPLFG |
| SFTSV | VIEGSDDSA | IMISIRPK | SDMDEV | RSRFFV  | ANLLH  | SVKYL | LNPLFG |
| HRTV  | VLEGSDDSA | IMISLKP  | ASDN   | EEAMARE | LTANLL | YSVRV | LNPLFG |

## BUNV\_Polymerase domain

|       |          |         |         |         |         |         |         |
|-------|----------|---------|---------|---------|---------|---------|---------|
|       | 1200     | 1210    | 1220    | 1230    | 1240    | 1250    | 1260    |
| GTV   | LVRPTIRW | VAAASHQ | ISETEAL | ASRQEDY | SNNLLTQ | CLEGGAS | SFSLTYL |
| SFTSV | LVRPTIRW | VAAASHQ | ISETEAL | ASRQEDY | SNNLLTQ | CLEGGAS | SFSLTYL |
| HRTV  | LVRPTIRW | VAAASHQ | ISESEAL | ASRQEDY | ANLLTQ  | CLEGGSS | SFSLTYL |

## BUNV\_Polymerase domain

|       |         |         |        |        |        |        |       |
|-------|---------|---------|--------|--------|--------|--------|-------|
|       | 1270    | 1280    | 1290   | 1300   | 1310   | 1320   | 1330  |
| GTV   | FMGMILS | DPDPALG | FFLMDN | PAFAGG | AGFRNL | WRACKT | TDLGR |
| SFTSV | FMGMILS | DPDPALG | FFLMDN | PAFAGG | AGFRNL | WRACKT | TDLGR |
| HRTV  | FVGMILS | DPDPALG | FFLMDN | PAFAGG | AGFRNL | WRACKF | TNLGR |

## BUNV\_Polymerase domain

|       |          |       |        |       |       |        |        |
|-------|----------|-------|--------|-------|-------|--------|--------|
|       | 1340     | 1350  | 1360   | 1370  | 1380  | 1390   | 1400   |
| GTV   | GGTLSHSV | MYWGD | RKKYQS | LLERM | GLPSD | WVEQID | ENPGT  |
| SFTSV | GGTLSHSV | MYWGD | RKKYQ  | ALLNR | MGLP  | EDWVE  | QIDENP |
| HRTV  | GGTLSHSV | MYWGD | RKKYQ  | HLLDR | MGLP  | KDWVE  | RIDENP |

|       |          |        |        |       |       |      |        |
|-------|----------|--------|--------|-------|-------|------|--------|
|       | 1410     | 1420   | 1430   | 1440  | 1450  | 1460 | 1470   |
| GTV   | KGHVVPRV | VAAAGV | LLSRHC | FRFS  | ASIHG | KGPS | OKASLI |
| SFTSV | KGHVVPRV | VAAAGV | LLSRHC | FRFS  | SSIHG | RGS  | OKASLI |
| HRTV  | KGHVVPRV | VAAAGV | LLSRHC | FRYTA | ASIHG | RGS  | OKASLI |

1480 1490 1500 1510 1520 1530 1540  
GTV YERVCTLLLEVENLTGKFVVRERNIVRSRIDLFQDPVDLRCKAEDLVSEVWFGLKRTKLGPRLLKEEWDK  
SFTSV YDRVCTLLLEVEHELTGKFVVRERNIVRSRIDLFQEPVDLRCKAEDLVSEVWFGLKRTKLGPRLLKEEWDK  
HRTV YERVL TLLDEVTA LTGKFVVRERNIVRSRVELFQEPVDLRCKAENLIAEMWFG LKRTKLGPRLLKEEWDK

1550 1560 1570 1580 1590 1600 1610  
GTV LRASF AWLSTD PAETL RDGPFMSHVQFRNFIAHVDAKRSVRLLGAPVKKSGGVTTINQVVRM NFFPGF C  
SFTSV LRASF AWLSTD PS ETL RDGPF LSHVQFRNFIAHVDAKRSVRLLGAPVKKSGGVTTISQVVRM NFFPGF S  
HRTV LRASF SWLSTD HK ETL DVGPF LSHVQFRNFIAHVDAKRSVRLLGAPVKKSGGVTTV SQVVK S NFFPGF I

1620 1630 1640 1650 1660 1670 1680  
GTV LDAEK SLDNQERLESISILKHL LFM TLNGPYTEEYK LDMIMEAFESLALPQPT EVIRKSR TMTLCLISNY  
SFTSV LEAEK SLDNQERLESISILKHV LFM TLNGPYTEEYK LEMIEAFSTLVIPQPS EVIRKSR TMTLCLISNY  
HRTV LD SSE SLD DQERVE GVSILKHL LFM TLNGPYTDEQK KAMVLETE QYFALPHAAEVVKRSRSL TLCLMKNF

1690 1700 1710 1720 1730 1740 1750  
GTV FS QKGG SILDQIEK AQSGLGGFSKPKRTFIRPGGS IGYKKG VWTGV MEDTHVQLLIDGDGT SNWLEEI  
SFTSV LS SKGG SILDQIERAQSGLGGFSKPKRTFIRPGGVGYKKG VWTGV MEDTHVQLLIDGDGT SNWLEEI  
HRTV IE ORGG SILDQIEK AQSGLVGGFSKPKP YRKQSG IGYKKG VWSGIME NTNVQLLIDGDGS SNWLEEI

1760 1770 1780 1790 1800 1810 1820  
GTV RLSS E ARLYDVIES IRRLCD D LGI NN RVAS SFRGHCMVRLS GFKTKPASRT DGCPIRV L ERGFW IRELQN  
SFTSV RLSS D ARLYDVIES IRRLCD D LGI NN RVAS AYRGHCMVRLS GFKTKPASRT DGCPIRIM ERGFRIRELQN  
HRTV RLSS E SRLFDVIES VRRLCD D I NVN RVTS SFRGHCMVRLS NFKV KPASRV EGCPIR LMPSSFR IRELQN

1830 1840 1850 1860 1870 1880 1890  
GTV PDEV F MRVRGDILNLSV RIQEG RIMN ILSYR PRD TDISESAA AFLWSNK D SFSFGKKEPSCSWI CLKTL D  
SFTSV PDEV K MRVRGDILNLSV TIQEG RVMN ILSYR PRD TDISESAA YLWSNRDL SFSFGKKEPSCSWI CLKTL D  
HRTV PDEV F LRVRGDILNLSI ILQED RVMN ILSYR ARD TDISESAA SYLWMNR TD SFSFGKKEPSCSWM CLKTL D

1900 1910 1920 1930 1940 1950 1960  
GTV NWAWS HASTL LATKR KTPG I NNE LMGNIFRDCLEG SLRKQGLMRSKLS ELVEKNV IPLT TQELVDILEED  
SFTSV NWAWS HASVLL ANDRK TPQGI DN RAMGNIFRDCLEG SLRKQGLMRSKLS TEMVEKNV V IPLT TQELVDILEED  
HRTV SWAWN QAARV LERNI KTPG I DNT AMGNIFRDCLES SLRKQGLMRSRI AEMVERHVI IPLT S QELVDILEED

|       | 1970  | 1980     | 1990    | 2000   | 2010   | 2020  | 2030 |        |    |        |   |        |   |      |       |   |
|-------|-------|----------|---------|--------|--------|-------|------|--------|----|--------|---|--------|---|------|-------|---|
| GTV   | IDFS  | DVIATELS | EGSLDIE | SIFDGA | PMLWS  | AEVEE | FGE  | GMVAIS | YS | SKYYHL | T | LMDQAA | A | TMCA | IMGKE | G |
| SFTSV | IDFS  | DVIATELS | EGSLDIE | SIFDGA | PMLWS  | AEVEE | FGE  | GVVAVS | YS | SKYYHL | T | LMDQAA | A | TMCA | IMGKE | G |
| HRTV  | VDFSE | EMMQSDI  | MEGLDID | ILMEG  | SPMLWA | AEVEE | MGE  | AMVILS | QS | GKYYHL | K | LMDQAA | T | LS   | ILGKD | G |

|       | 2040 | 2050       | 2060      | 2070  | 2080 |      |   |      |       |   |     |    |     |
|-------|------|------------|-----------|-------|------|------|---|------|-------|---|-----|----|-----|
| GTV   | CRS  | LLTEKRCMSA | IREQVKPFL | IFLQI | PEDS | ITWV | C | QIA  | ESRGL | D | EES | AI | MWG |
| SFTSV | CRG  | LLTEKRCMAA | IREQVRPFL | IFLQI | PEDS | ISWV | S | DQFC | DSRGL | N | EES | TI | MWG |
| HRTV  | CRL  | LLGRPTGRSN | LREQVKPYL | TLLQI | REGD | VNWV | S | EYKD | DRGL  | D | EDS | AE | MWG |

# Figure S4 B

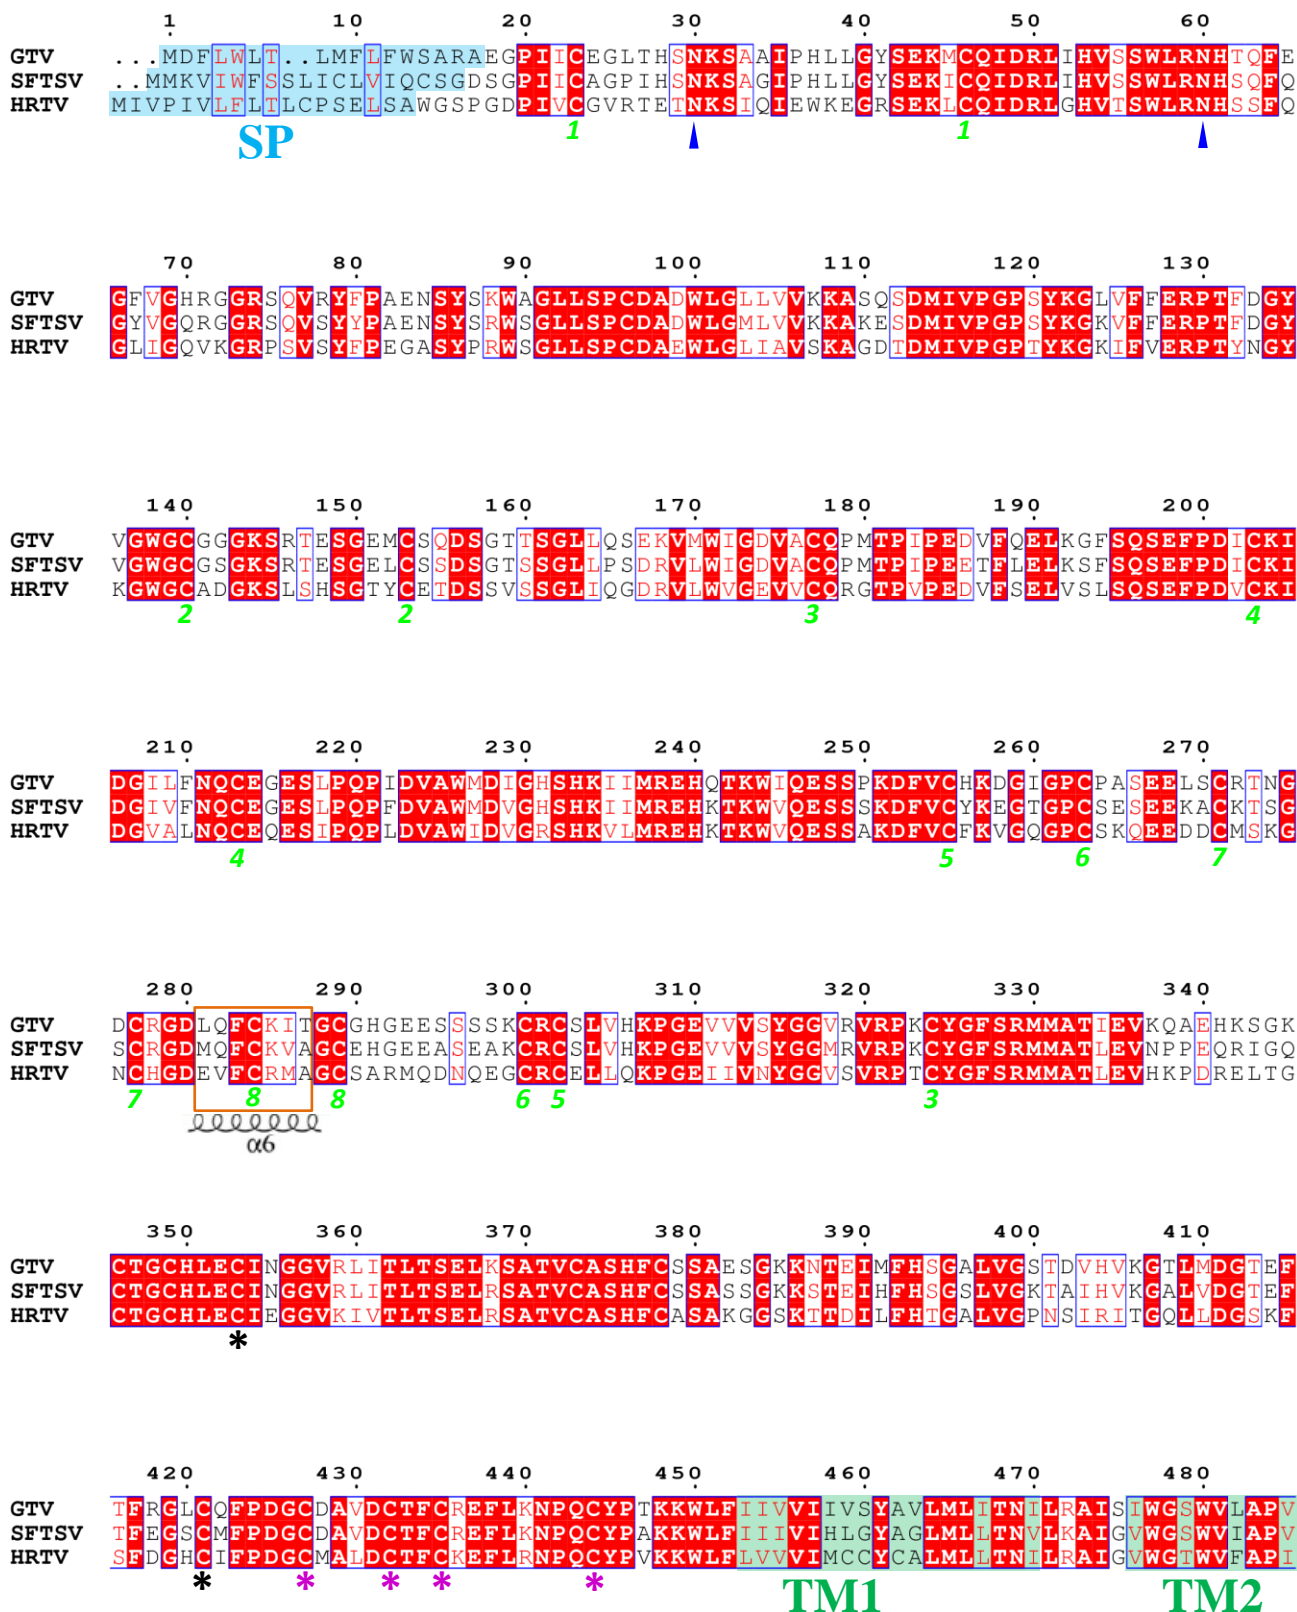



490 500 510 520 530 540 550

GTV KLTIAIMRKLVRLLTLKA LNQAADRGRRVIYEMDGA..QRVHEEGA RVEIARPRR VRHWMYSPVILGITL

SFTSV KLMFAITKKLMR TVSCLV GKLMDRGRQVIHEEIGEN..GEGNQDDVRIEMARPRR VRHWMYSPVILTILA

HRTV KLALALGLRLAKLSKKG LVAVVT RGMIVNDELHQVRRVERGEQNEG RQGYGPRGP I RHWLYSPALITILT

TM2

560 570 580 590 600 610 620

GTV AGSAN GCDELVHADSKL I SCCKQGGNNKVKCAT TGRALLPAVNPQT ACLHFSAPGSPDSKCLKIKVKIN

SFTSV IGLAE GCDELVHADSKL V SCCKQGGNNKVKCAT TGRALLPAVNPQT ACLHFTAPGSPDSKCLKIKVKRIN

HRTV TSICS GCDELVHAESKLS ITCKSASGNKVKCAT TGRALLPAVNPQT ACLHFSVPGSPDSKCLKIKVKSIN

1 2 2 1

630 640 650 660 670 680 690

GTV LRCKKKA SSYVVPDARS RCTSVRRRCRWAGDCQSGCPSHFTSNSFSDDWAGKMDRAGLGFSGCSDGCGGAAC

SFTSV LRCKKKS SSYVVPDARS RCTSVRRRCRWAGDCQSGCPSHFTSNSFSDDWAGKMDRAGLGFSGCSDGCGGAAC

HRTV LRCKQA SSYVVPDARS RCTSVRRRCRWAGDCQSGCPSHFTSNSFSDDWAGKMDRAGLGM SGCSDGCGGAAC

3 4 5 6 7 8

Loop 1

Loop 2

700 710 720 730 740 750 760

GTV GCFNAAPSCIFWRKQVENPHGVIWKVSPCAAWVPSAEVEVTIPSGKSKVVFHPMSGVPTQAFKGVSTITYLG

SFTSV GCFNAAPSCIFWRKQVENPHGVIWKVSPCAAWVPSAEVEVTIPSGKSKVVFHPMSGVPTQAFKGVSTITYLG

HRTV GCFNAAPSCIFWRKQVENPHSNRVIWKVSPCAAWVPSAEVEVTIPSGKSKVVFHPMSGVPTQAFKGVSTITYLG

5 6 3

Loop 2

770 780 790 800 810 820 830

GTV SELEVSGITELCEIEELKSGR LALAPCNQAGMGVVGK IGEIQCSS EESARTIKK DGCIWN S DLVGIELRV

SFTSV SDMEVSGITDLCEIEELKSKK LALAPCNQAGMGVVGK VGEIQCSS EESARTIKK DGCIWN A DLVGIELRV

HRTV SSELIVGMITRLCEMKEMGTGIMALAPCNDP GHAIMGNVGEIQCSS IESAKHIRS DGCIWN A DLVGIELRV

9 9 10 10

840 850 860 870 880 890 900

GTV DDAVCFESKITSVEAVANYS AIP TITIGGLRFE RSHDSQGGKIS GSPLDITAIRGE FSVSYRGLRLS LSEITA

SFTSV DDAVCFESKITSVEAVANYS AIP TITIGGLRFE RSHDSQGGKIS GSPLDITAIRGE FSVNYRGLRLS LSEITA

HRTV DDAVCFESKITSVEAVANYS AIP TITIGGLRFE RSHDSQGGKIS GSPLDITAIRGE FSVSFRGMRLK LSEISA

4

910 920 930 940 950 960 970

GTV TCTGEVNTISGCYSCMMGAKVSIIRLHNSKNST AHLKCS S DETAFSVSEGVHSYTVSLSYDHA VVDETC IIL

SFTSV TCTGEVNTVSGCYSCMTGAKVSIKRLHNSKNNT AHVRC KGG DETAFSVLEGVHSYIVSLSFDH AVVDETC QL

HRTV SCTGEITNTVSGCYSCMTGASVSIKRLHNSKNNT TGH LKCS D S DETAFSVMEGHTYRPHMS EDKAVI DEECVL

11 12 12 13 13

|       |        |           |          |         |        |      |          |           |        |           |        |            |
|-------|--------|-----------|----------|---------|--------|------|----------|-----------|--------|-----------|--------|------------|
|       | 980    | 990       | 1000     | 1010    | 1020   | 1030 | 1040     |           |        |           |        |            |
| GTV   | NCGGHE | SQVNVKGNL | VFLDIPRF | FVDGSYV | QTYHST | VP   | TGASIPSP | TDWLNALFG | NGITRW | ILGAAGVLL | T      |            |
| SFTSV | NCGGHE | SQVTLKGNL | IFLDVPK  | FVDGSYM | QTYHST | VP   | TGANIPSP | TDWLNALFG | NGLSRW | ILGVIGVLL | G      |            |
| HRTV  | NCGGHS | SKLLKGS   | LVFMDVPR | FVDGSYV | QTYHST | KVP  | AGGRV    | PNP       | V      | DWLNALFG  | DGITRW | ILGIIGVLLA |

11 TM3

|       |         |           |             |
|-------|---------|-----------|-------------|
|       | 1050    | 1060      |             |
| GTV   | GFAVIHL | DCVSPEIWN | KEVD.....   |
| SFTSV | GLALFFL | IMFLLKLGT | KQVFRSRTKLA |
| HRTV  | CVMLFVV | VVAITRRLI | KGLT.QRAKVA |

TM3



# Figure S4 C

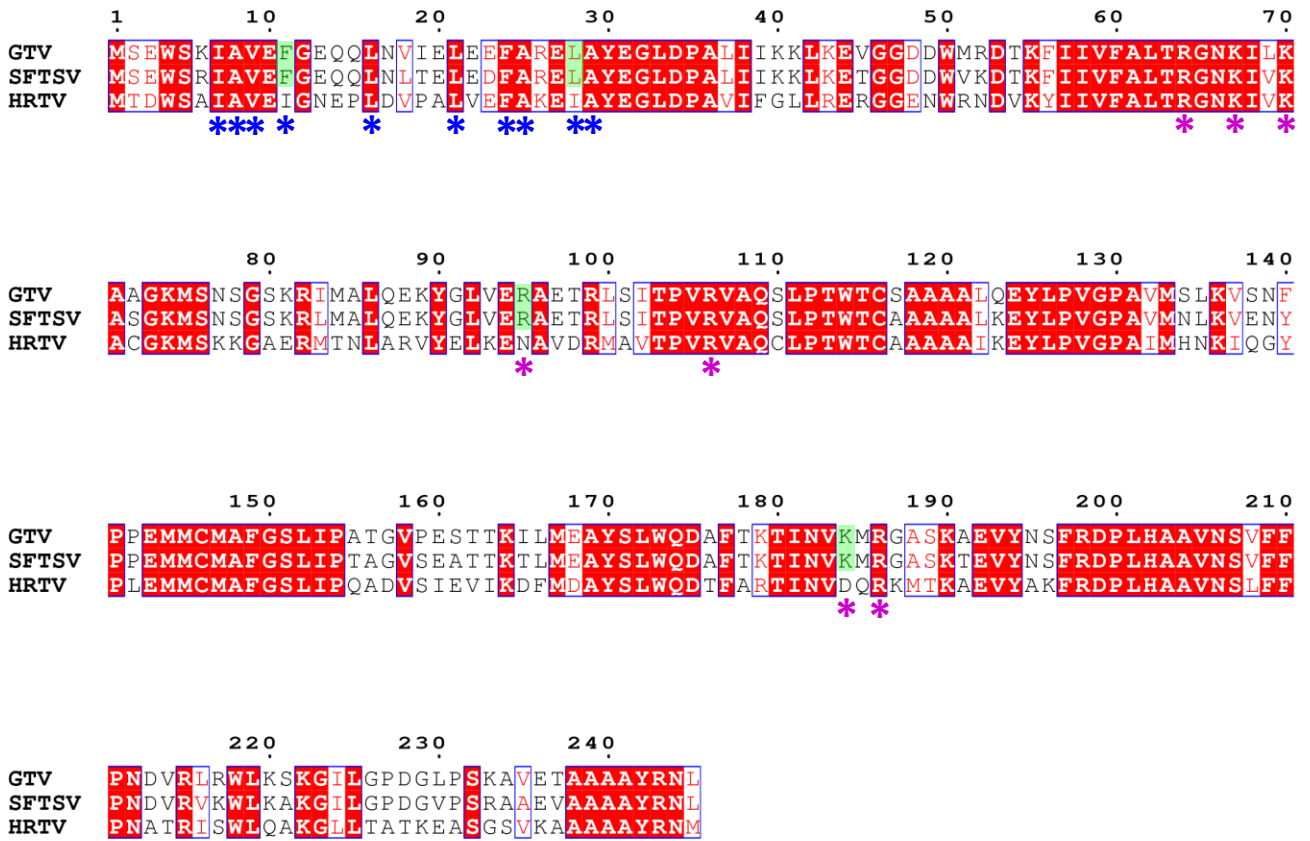

Supplement: 41426_2018_93_MOESM7_ESM.pdf [file 41426_2018_93_MOESM7_ESM.pdf]
